# Supplementary material
Source: publisher site journal article supplement (https://www.dovepress.com/article/572735)
Supplement: Supplementary file 1 [file 572735%20Supplementary%20Material.docx]

Supplementary Table 1. “Neurotest” cognitive battery tests results in study subgroups non-smokers/former smokers and current smokers

|  | **Non-smokers**  **(n = 66)** | **Former Smokers**  **(n = 41)** | **Current Smokers**  **(n=11)** | **p** |
| --- | --- | --- | --- | --- |
| **Age, y** | 66,0  (60,0 – 70,0) | 67,0  (62,0 – 71,0) | 66,0  (60,0 – 70,5) | 0,75 |
| **SRT correct answers, n** | 25,0  (25,0 – 25,0) | 25,0  (25,0 – 25,0) | 25,0  (25,0 – 25,0) | 0,94 |
| **SRT reaction time, ms** | 283,1  (234,6 – 323,6) | 283,0  (243,8 – 340,9) | 273,7  (227,1 – 311,1) | 0,38 |
| **G/nG incorrectNoGo, n** | 4,0  (2,0 – 7,0) | 5,5  (2,5 – 8,0) | 6,0  (3,5 – 8,0) | 0,65 |
| **G/nG correct Go, n** | 74,0  (73,0 – 75,0) | 74,0  (72,5 – 75,0) | 73,0  (71,5 – 74,5) | 0,35 |
| **G/nG reaction time, ms** | 363,9  (313,6 – 412,3) | 366,5  (342,1 – 424,6) | 349,4  (322,2 – 405,8) | 0,31 |
| **VM1** | 6,0  (5,0 – 7,0) | 6,0  (4,5 – 7,0) | 5,0  (4,0 – 5,0) | 0,22 |
| **VM2** | 7,0  (7,0 – 8,0) | 7,0  (6,0 – 8,0) | 6,0  (5,0 – 7,5) | **0,035**  **Non-smokers vs Current smokers 0,008**  **Non-smokers vs Former smokers 0,13**  **Former smokers vs Current smokers 0,12** |
| **VM3** | 8,0  (7,0 – 9,0) | 7,0  (6,0 – 8,0) | 7,0  (6,5 – 8,5) | 0,13 |
| **VM4** | 8,0  (8,0 – 10,0) | 8,0  (6,0 – 9,0) | 7,5  (6,0 – 8,5) | 0,11 |
| **VM5** | 8,0  (8,0 – 10,0) | 8,0  (6,0 – 9,0) | 7,5  (6,0 – 8,5) | 0,09 |
| **VMDT, n** | 6,0  (5,0 – 7,0) | 6,0  (4,5 – 7,0) | 5,0  (4,5 – 7,0) | 0,65 |
| **VWMT, no answers** | 0,0  (0,0 – 0,0) | 0,0  (0,0 – 1,0) | 0,0  (0,0 – 0,0) | 0,49 |
| **VWMT, incorrect time, ms** | 3344  (0,0 – 4453) | 3618  (0,0 – 5473) | 4082  (0,0 – 6125) | 0,62 |
| **VWMT, correct time, ms** | 2828  (2421 – 4023) | 3463  (2490 – 4578) | 4612  (3539 – 6031) | **0,013**  **Non-smokers vs Current smokers 0,001**  **Non-smokers vs Former** smokers 0,27  Former smokers vs Current smokers 0,022 |
| **VWMT, n** | 5,0  (3,0 – 7,0) | 5,0  (4,0 – 6,0) | 6,0  (4,0 – 6,5) | 0,78 |
| **HADS A** | 2,0  (1,0 – 5,0) | 4,0  (1,5 – 6,0) | 3,5  (0,5 – 8,5) | 0,29 |
| **HADS D** | 2,0  (1,0 – 5,0) | 3,0  (1,0 – 4,0) | 2,5  (1,0 – 6,5) | 0,95 |

**Data are presented as medians with 25th and 75th percentiles. Statistically significant results are marked in bold.
Abbreviations:** SRT – Simple Reaction Test; G/nG – Go/No-Go test (incorrect No-Go answers, correct Go answers, reaction time); VM1–5 – Verbal Memory Test, trials 1–5; VMDT – Verbal Memory Delayed Test; VWMT – Visual Working Memory Test (number of no answers, incorrect answers time, correct answers time, number of correct answers); HADS – Hospital Anxiety and Depression Scale (A – anxiety subscale, D – depression subscale).

Supplementary Table 2. Results of cognitive testing (Neurotest) and affective measures (HADS) in study subgroups with different frequency of physical activity (PA).

|  | **No PA**  **(n = 40)** | **1/week**  **(n = 24)** | **2-3/week**  **(n=22)** | **>3/week**  **(n=32)** | **p** |
| --- | --- | --- | --- | --- | --- |
| **Age, y** | 67,0  (63,0 – 70,0) | 63,5  (58,5 – 70,0) | 66,5  (63,0 – 71,0) | 54,5  (48,0 – 61,0) | 0,26 |
| **SRT correct answers, n** | 25,0  (25,0 – 25,0) | 25,0  (25,0 – 25,0) | 25,0  (25,0 – 25,0) | 25,0  (25,0 – 25,0) | 0,44 |
| **SRT reaction time, ms** | 303,3  (251,1 – 363,2) | 271,8  (231,8 – 323,3) | 288,4  (255,0 – 325,2) | 220,3  (213,5 – 227,2) | 0,14 |
| **G/nG incorrectNoGo, n** | 6,0  (3,0 – 9,0) | 3,5  (2,0 - 6,5) | 4,0  (2,0 – 8,0) | 5,0  (2,5 – 7,5) | 0,16 |
| **G/nG correct Go, n** | 74,0  (69,0 – 75,0) | 74,0  (73,0 – 75,0) | 74,0  (72,0 – 75,0) | 74,0  (73,5 – 75,0) | 0,24 |
| **G/nG reaction time, ms** | 370,3  (314,6 – 415,8) | 366,4  (327,0 – 401,9) | 372,9  (331,3 – 402,3) | 357,4  (317,6 – 440,4) | 0,95 |
| **VM1** | 5,0  (4,0 – 6,0) | 6,0  (5,0 – 7,0) | 5,0  (4,0 – 7,0) | 6,0  (5,0 – 7,0) | 0,16 |
| **VM2** | 7,0  (6,0 – 8,0) | 7,5  (6,0 – 8,0) | 7,0  (6,0 – 8,0) | 7,0  (7,0 – 8,0) | 0,79 |
| **VM3** | 7,0  (6,0 – 8,0) | 7,0  (6,0 – 8,0) | 8,0  (7,0 – 9,0) | 8,0  (7,0 – 8,5) | 0,28 |
| **VM4** | 8,0  (7,0 – 9,0) | 8,0  (6,0 – 9,0) | 8,0  (7,0 – 9,0) | 8,5  (8,0 – 10,0) | 0,23 |
| **VM5** | 8,0  (7,0 – 9,5) | 8,0  (6,0 – 9,0) | 8,0  (7,0 – 9,0) | 8,5  (7,5 – 10,0) | 0,31 |
| **VMDT, n** | 5,0  (5,0 – 7,0) | 6,0  (4,5 – 7,0) | 5,0  (5,0 – 7,0) | 9,5  (9,0 – 10,0) | 0,14 |
| **VWMT, no answers** | 0,0  (0,0 – 1,0) | 0,0  (0,0 – 0,0) | 0,0  (0,0 – 1,0) | 0,0  (0,0 – 0,5) | 0,77 |
| **VWMT, incorrect time, ms** | 3653  (0,0 – 5570) | 2187  (0,0 – 4039) | 3648  (2547 – 5432) | 3477  (0,0 – 4379) | 0,31 |
| **VWMT, correct time, ms** | 3274  (2653 – 5589) | 3647  (2634 – 4654) | 2749  (2131 – 4140) | 2954  (2460 – 3804) | 0,24 |
| **VWMT, n** | 5,0  (3,0 – 6,5) | 6,0  (4,0 – 7,0) | 5,0  (2,0 – 6,0) | 5,5  (3,0 – 6,0) | 0,47 |
| **HADS A** | 3,5  (1,0 – 6,0) | 5,0  (2,5 – 7,5) | 1,0  (0,0 – 3,0) | 2,0  (0,5 – 6,0) | 0,068 |
| **HADS D** | 2,5  (1,0 – 6,5) | 3,0  (1,0 – 6,0) | 2,0  (0,0 – 4,0) | 2,5  (0,0 – 5,5) | 0,40 |

**Data are presented as medians with 25th and 75th percentiles.
Abbreviations:** SRT – Simple Reaction Test; G/nG – Go/No-Go test (incorrect No-Go answers, correct Go answers, reaction time); VM1–5 – Verbal Memory Test, trials 1–5; VMDT – Verbal Memory Delayed Test; VWMT – Visual Working Memory Test (number of no answers, incorrect answers time, correct answers time, number of correct answers); HADS – Hospital Anxiety and Depression Scale (A – anxiety subscale, D – depression subscale).

Supplementary Table 3. Results of cognitive testing (Neurotest) and affective measures (HADS) in study subgroups with correct BMI, overweight and with obesity

|  | **Normal**  **(n=24)** | **Overweight**  **(n=68)** | **Obesity**  **(n=26)** | **p** |
| --- | --- | --- | --- | --- |
| **Age, y** | 67,0  (57,0 – 69,5) | 65,0  (60,5 – 70,0) | 68  (63,0 – 71,0) | 0,73 |
| **SRT correct answers, n** | 25,0  (25,0 – 25,0) | 25,0  (25,0 – 25,0) | 25,0  (25,0 – 25,0) | 0,97 |
| **SRT reaction time, ms** | 250,1  (226,4 – 304,0) | 288,2  (247,9 – 343,3) | 283,8  (252, - 343,9) | 0,08 |
| **G/nG incorrectNoGo, n** | 6,0  (3,5 – 7,5) | 4,0  (2,0 – 8,0) | 6,5  (3,0 – 8,0) | 0,72 |
| **G/nG correct Go, n** | 74,0  (72,0 – 75,0) | 74,0  (72,0 – 75,0) | 74,0  (73,0 – 75,0) | 0,45 |
| **G/nG reaction time, ms** | 360,9  (316,3 – 403,2) | 357,4  (315,9 – 410,0) | 396,8  (358,3 – 439,1) | 0,052 |
| **VM1** | 5,0  (4,0 – 6,0) | 6,0  (5,0 – 7,0) | 5,0  (4,0 – 7,0) | 0,18 |
| **VM2** | 7,0  (6,0 – 8,0) | 7,0  (6,0 – 8,0) | 8,0  (6,0 – 9,0) | 0,71 |
| **VM3** | 7,0  (6,0 – 8,0) | 7,0  (7,0 – 8,5) | 8,0  (7,0 – 9,0) | 0,48 |
| **VM4** | 8,0  (6,0 – 9,5) | 8,0  (7,0 – 10,0) | 8,0  (7,0 – 9,0) | 0,75 |
| **VM5** | 8,0  (6,0 – 9,5) | 8,0  (7,5 – 10,0) | 7,5  (7,0 – 9,0) | 0,42 |
| **VMDT, n** | 5,0  (4,0 – 7,5) | 6,0  (5,0 – 7,0) | 6,0  (5,0 – 7,0) | 0,52 |
| **VWMT, no answers** | 0,0  (0,0 – 1,0) | 0,0  (0,0 – 0,0) | 0,0  (0,0 – 1,0) | 0,42 |
| **VWMT, incorrect time, ms** | 3883  (0,0 – 5512) | 3403  (0,0 – 4273) | 3695  (0,0 – 5355) | 0,98 |
| **VWMT, correct time, ms** | 3582  (2772 – 5163) | 3000  (2470 – 4347) | 3211  (2355 – 4234) | 0,42 |
| **VWMT, n** | 5,0  (1,5 – 6,0) | 6,0  (4,0 – 7,0) | 5,0  (2,0 – 6,0) | 0,30 |
| **HADS A** | 3,0  (1,0 – 7,0) | 3,0  (1,0 – 6,0) | 3,0  (1,0 – 6,0) | 0,38 |
| **HADS D** | 3,0  (1,0 – 7,0) | 3,0  (1,0 – 4,0) | 2,0  (1,0 – 4,0) | 0,84 |

**Data are presented as medians with 25th and 75th percentiles.
Abbreviations:** SRT – Simple Reaction Test; G/nG – Go/No-Go test (incorrect No-Go answers, correct Go answers, reaction time); VM1–5 – Verbal Memory Test, trials 1–5; VMDT – Verbal Memory Delayed Test; VWMT – Visual Working Memory Test (number of no answers, incorrect answers time, correct answers time, number of correct answers); HADS – Hospital Anxiety and Depression Scale (A – anxiety subscale, D – depression subscale).
